# Supplementary material for: Excited state dynamics of protonated dopamine: hydration and conformation effects
Source: Royal Society of Chemistry journal article supplement (doi:10.1039/d2cp00543c), 2022-01-01
Supplement: d2cp00543c1.pdf [file d2cp00543c1.pdf]

## Excited state dynamics of protonated dopamine: Hydration and conformation effects

Keisuke Hirata,<sup>1,2,3</sup> Ken-ichi Kasai,<sup>1,4</sup> Koki Yoshizawa,<sup>1,4</sup> Gilles Grégoire,<sup>3,5\*</sup> Shun-ichi Ishiuchi<sup>1,2,3\*</sup> and Masaaki Fujii<sup>1,3,4\*</sup>

<sup>1</sup> Laboratory for Chemistry and Life Science, Institute of Innovative Research, Tokyo Institute of Technology, 4259 Nagatsu-ta-cho, Midori-ku, Yokohama, 226-8503, Japan

<sup>2</sup> Department of Chemistry, School of Science, Tokyo Institute of Technology. 2-12-1 4259 Ookayama, Meguro-ku, Tokyo, 152-8550, Japan

<sup>3</sup> Tokyo Tech World Research Hub Initiative (WRHI), Institute of Innovation Research, Tokyo Institute of Technology, 4259, Nagatsuta-cho, Midori-ku, Yokohama, 226-8503, Japan

<sup>4</sup> School of Life Science and Technology, Tokyo Institute of Technology. 4259 Nagatsuta-cho, Midori-ku, Yokohama, Kanagawa, 226-8503, Japan

<sup>5</sup> Université Paris-Saclay, CNRS, Institut des Sciences Moléculaires d'Orsay, F-91405 Orsay, France

### Supplementary Material

**Table S1** Gibbs free energy (180 K) of the ten lowest energy conformers of DAH<sup>+</sup>(H<sub>2</sub>O)<sub>3</sub>.

| Conf. | $\Delta G_{180K} / \text{kJmol}^{-1}$ |
|-------|---------------------------------------|
| G1-1  | 0                                     |
| G1-2  | 2.8                                   |
| G1-3  | 7.8                                   |
| G2-1  | 9.8                                   |
| G1-4  | 11.2                                  |
| G1-5  | 15.0                                  |
| G1-6  | 17.7                                  |
| G2-2  | 19.7                                  |
| G1-7  | 20.1                                  |
| G1-8  | 21.2                                  |

**Table S2** Gibbs free energy (180 K) of the six lowest energy conformers of DAH<sup>+</sup>(H<sub>2</sub>O).

| Conf. | $\Delta G_{180K} / \text{kJmol}^{-1}$ |
|-------|---------------------------------------|
| G1-1  | 0                                     |
| G1-2  | 0.4                                   |
| G2-1  | 0.5                                   |
| G2-2  | 1.5                                   |
| G2-3  | 1.5                                   |
| G1-3  | 2.1                                   |

**Table S3** Gibbs free energy (180 K) of the ten lowest energy conformers of  $\text{DAH}^+(\text{H}_2\text{O})_2$ .

| Conf. | $\Delta G_{180\text{K}} / \text{kJmol}^{-1}$ |
|-------|----------------------------------------------|
| G1-1  | 0                                            |
| G1-2  | 2.0                                          |
| G2-1  | 2.9                                          |
| G1-3  | 3.2                                          |
| G2-2  | 4.3                                          |
| G2-3  | 4.8                                          |
| G1-4  | 5.5                                          |
| G2-4  | 7.1                                          |
| G1-5  | 7.5                                          |
| G1-6  | 8.5                                          |

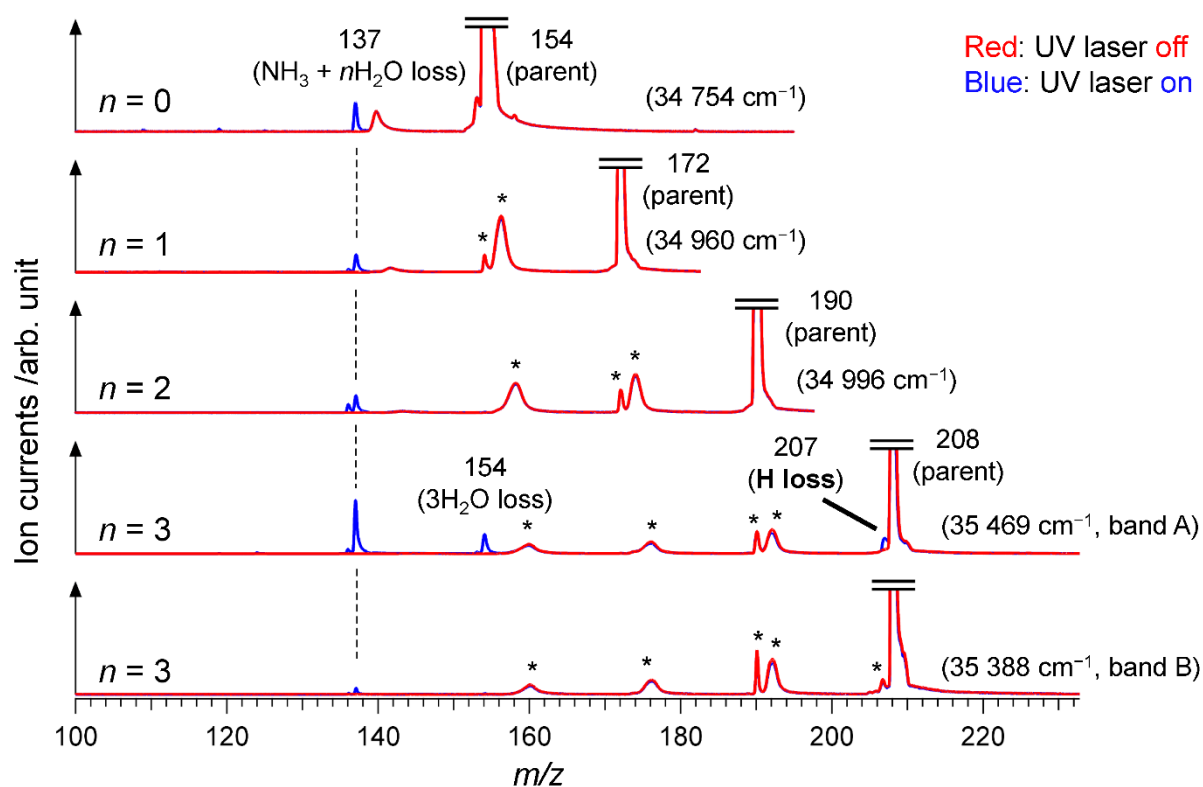

**Fig. S1** UV photodissociation mass spectra of  $\text{DAH}^+(\text{H}_2\text{O})_n$  ( $n = 0 - 3$ ). Blue and red lines correspond to the spectra with UV laser on and off, respectively. The peaks marked by asterisk show fragments caused by collision-induced dissociation. Numbers in parentheses show excitation wavenumber.

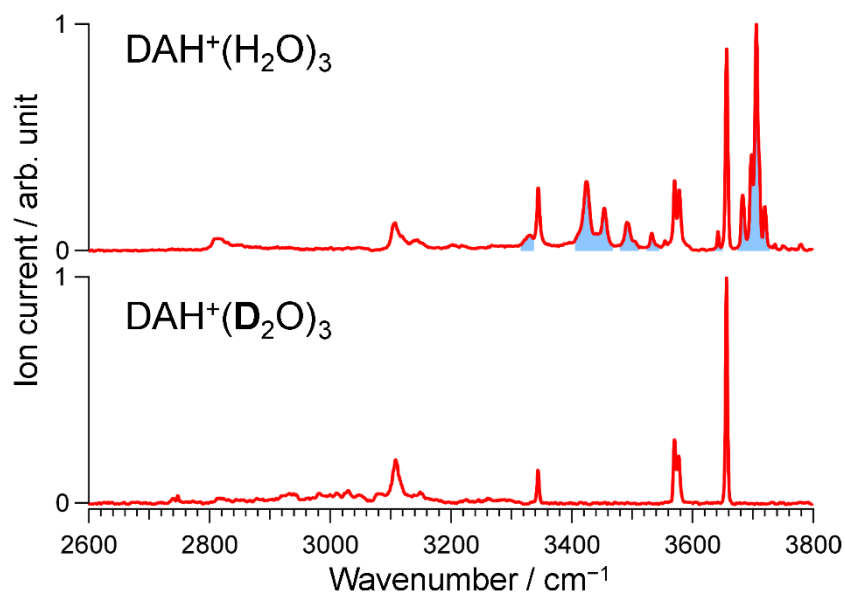

**Fig. S2** Comparison between the IRPD spectra of  $\text{DAH}^+(\text{H}_2\text{O})_3$  and  $\text{DAH}^+(\text{D}_2\text{O})_3$ . The blue shaded area enlightens the frequencies associated with water that disappear in the heavy water spectrum. The H/D scrambling in the linear ion trap is negligible due to the low temperature (180 K).<sup>1</sup>

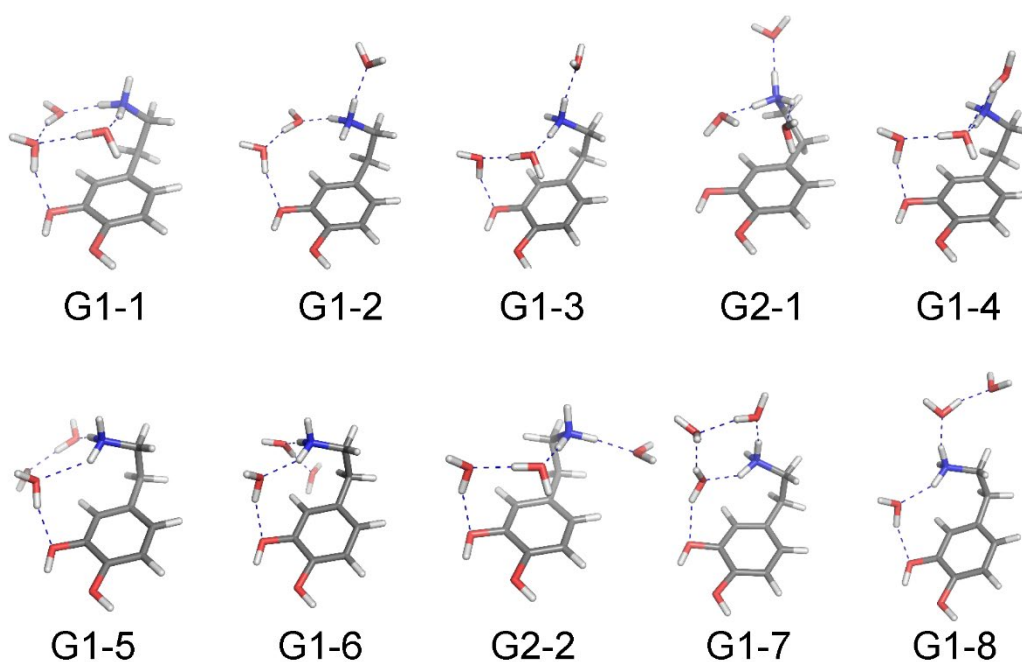

**Fig. S3** Structures of the ten lowest energy conformers of  $\text{DAH}^+(\text{H}_2\text{O})_3$ . G1 and G2 correspond to the syn and anti rotamer of  $\text{DAH}^+$ , respectively.

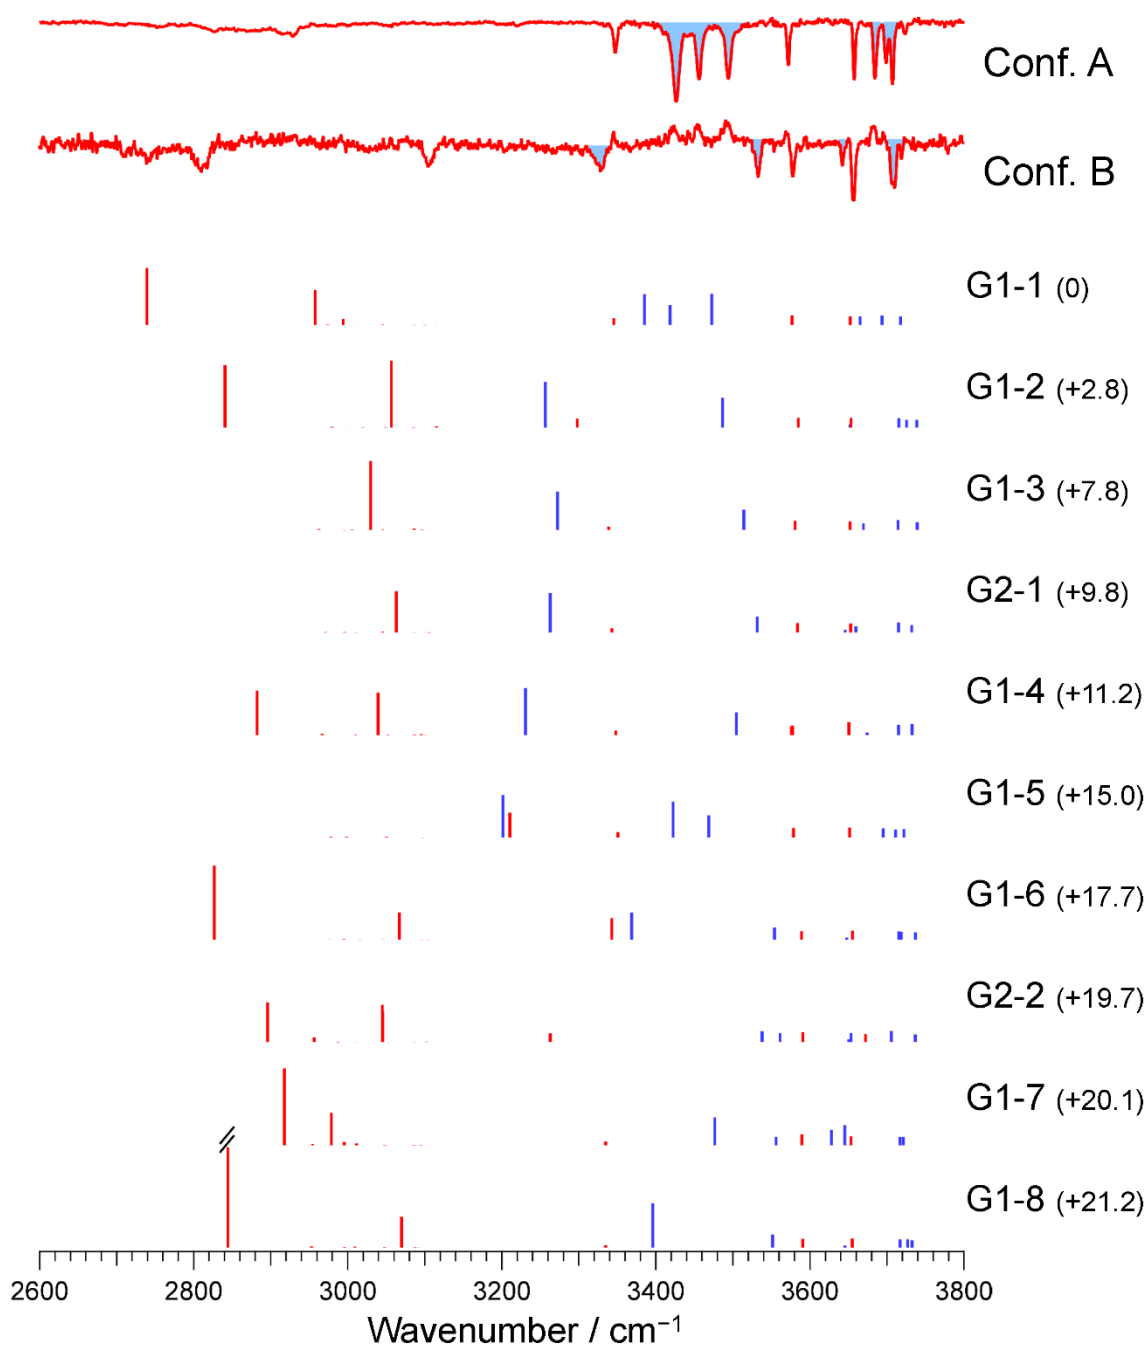

**Fig. S4** Calculated IR spectra of the ten lowest energy conformers of  $\text{DAH}^+(\text{H}_2\text{O})_3$ . Numbers in parentheses indicate Gibbs free energy at 180 K.

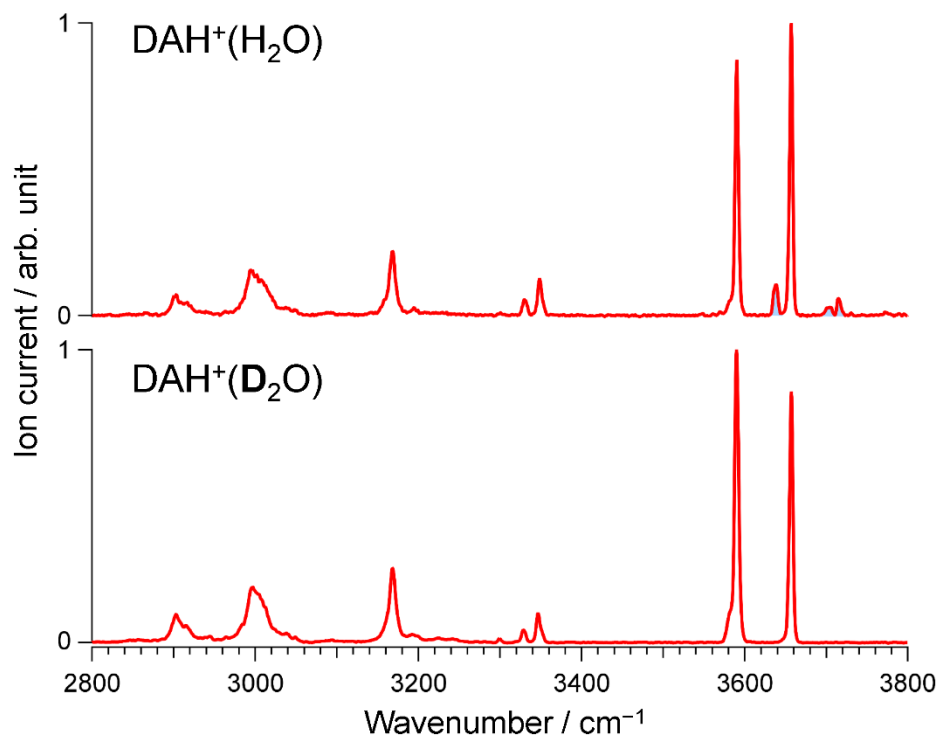

**Fig. S5** Comparison between the IRPD spectra of  $\text{DAH}^+(\text{H}_2\text{O})$  and  $\text{DAH}^+(\text{D}_2\text{O})$ . The blue shaded area enlightens the frequencies associated with water that disappear in the heavy water spectrum.

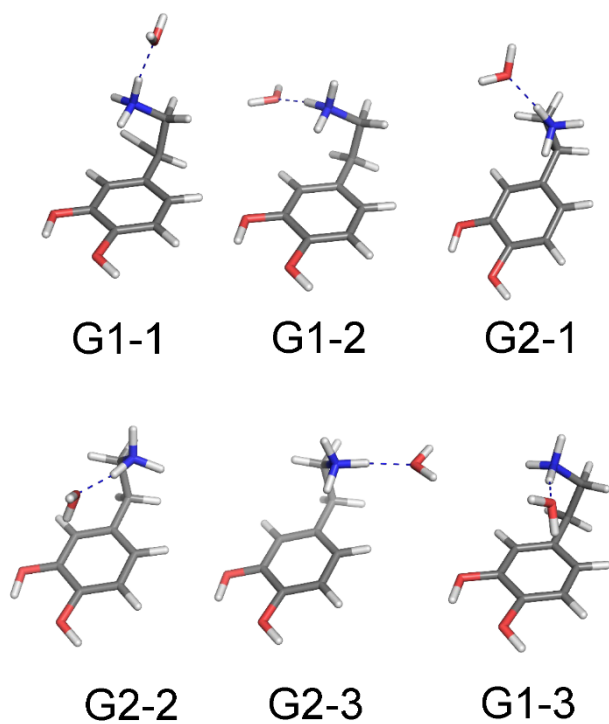

**Fig. S6** Structures of the six lowest energy conformers of  $\text{DAH}^+(\text{H}_2\text{O})$ .

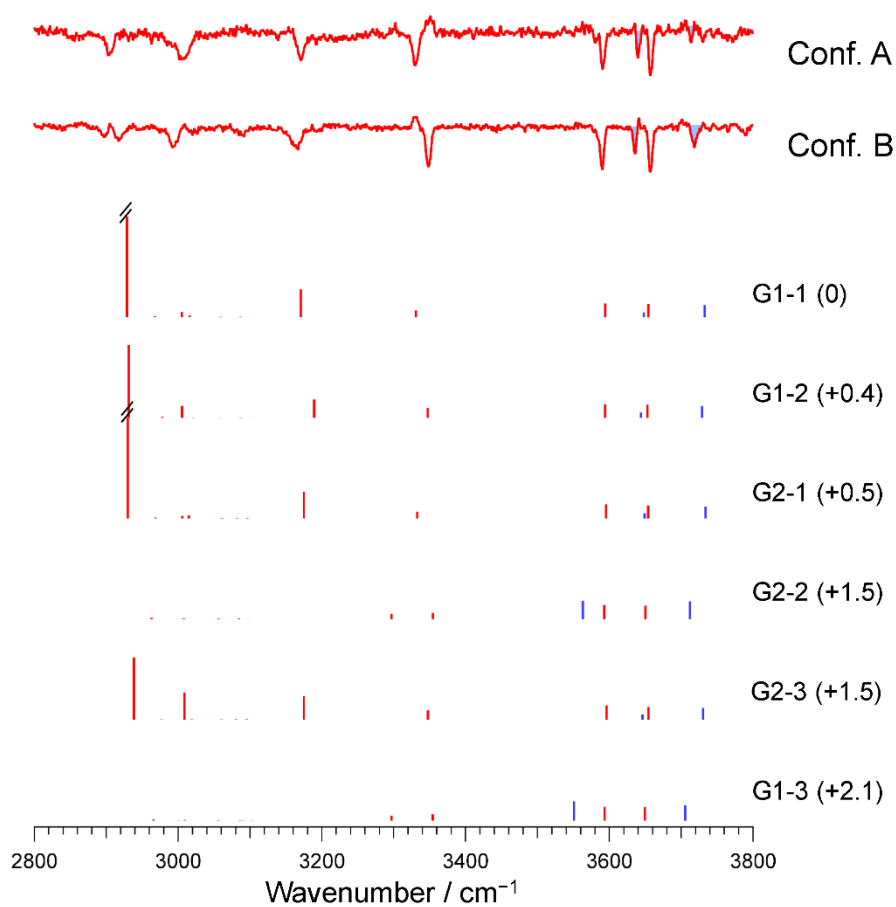

**Fig. S7** Calculated IR spectra of the six lowest energy conformers of  $\text{DAH}^+(\text{H}_2\text{O})$ . Numbers in parentheses indicate Gibbs free energy at 180 K.

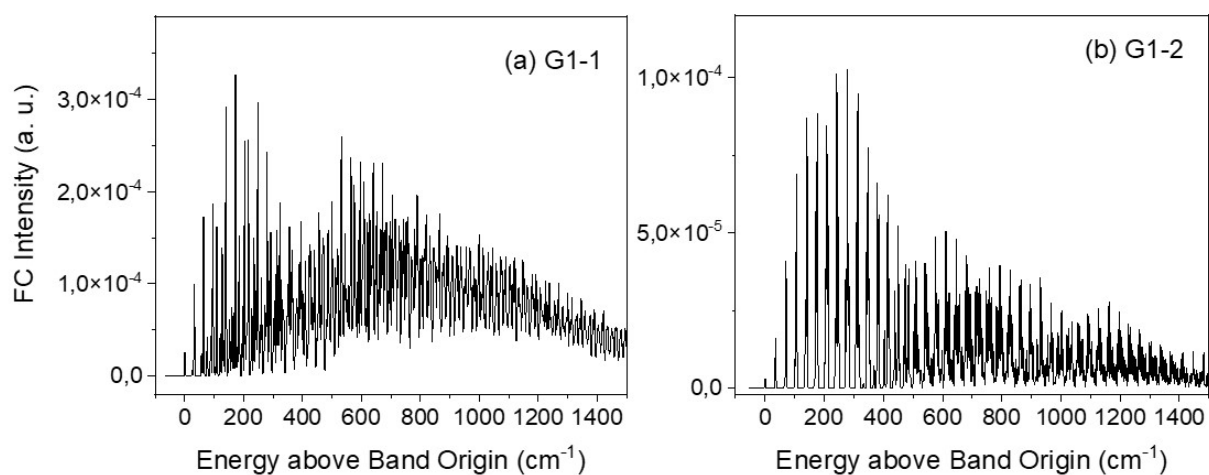

**Fig. S8** Calculated Franck-Condon factors of the two conformers (a) G1-1 and (b) G1-2 of  $\text{DAH}^+(\text{H}_2\text{O})$ .

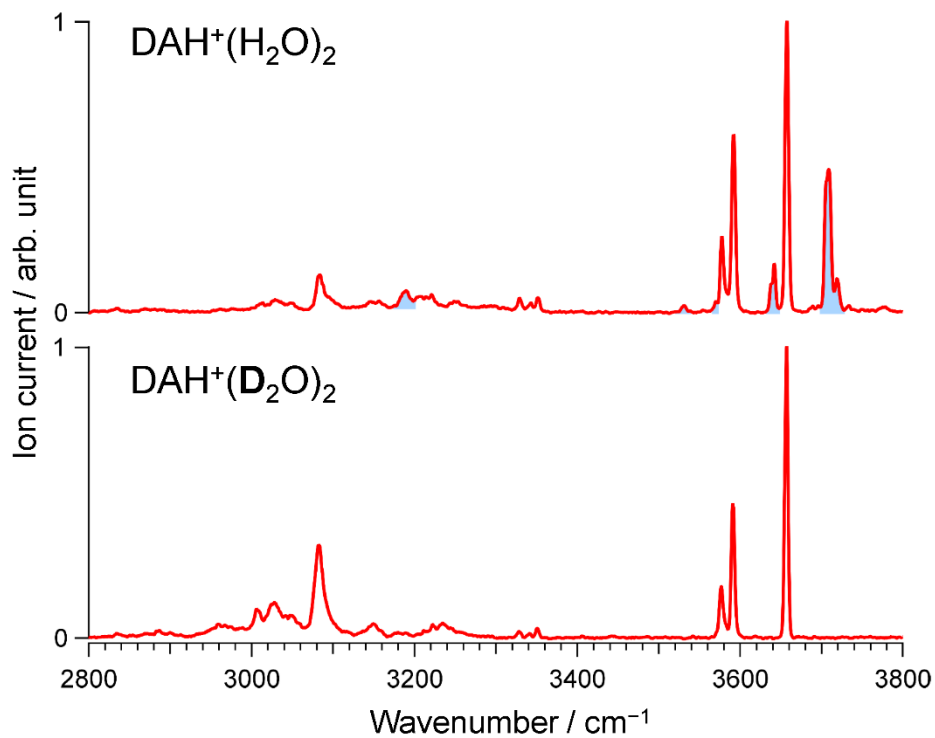

**Fig. S9** Comparison between the IR spectra of  $\text{DAH}^+(\text{H}_2\text{O})_2$  and  $\text{DAH}^+(\text{D}_2\text{O})_2$ . The blue shaded area enlightens the frequencies associated with water that disappear in the heavy water spectrum.

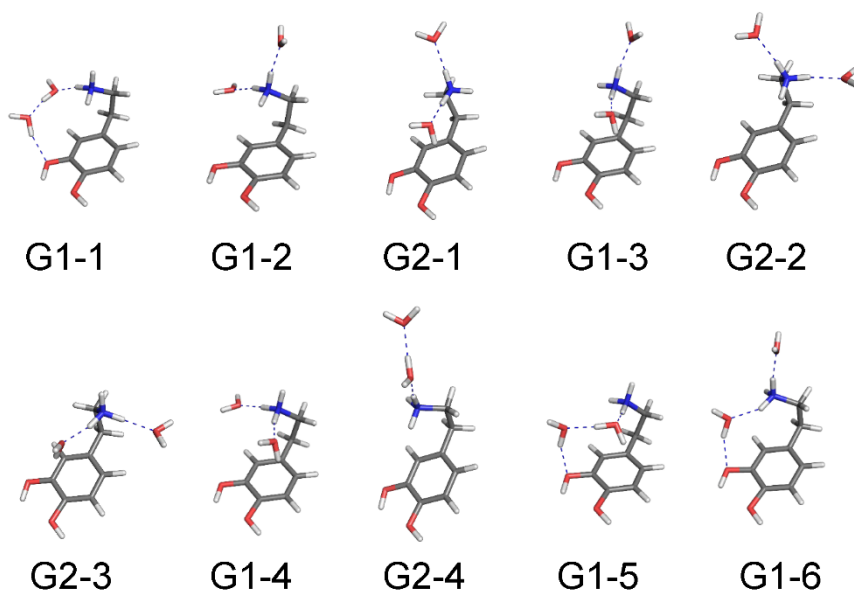

**Fig. S10** Structures of the ten lowest energy conformers of  $\text{DAH}^+(\text{H}_2\text{O})_2$ .

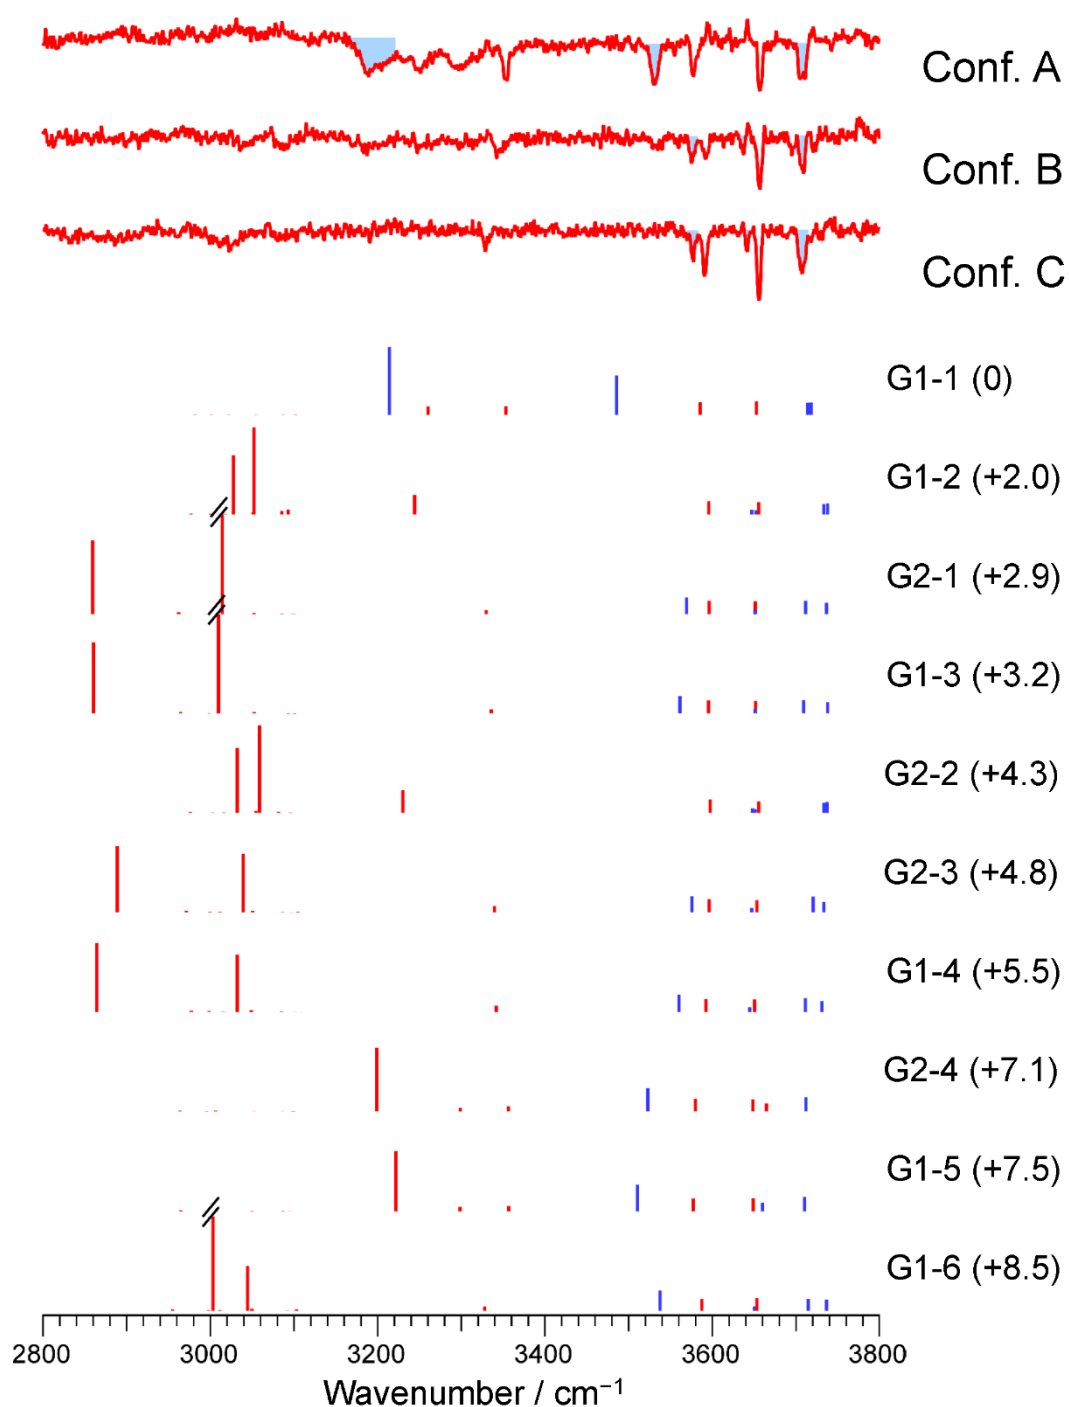

**Fig. S11** Calculated IR spectra of the ten lowest energy conformers of  $\text{DAH}^+(\text{H}_2\text{O})_2$ . Numbers in parentheses indicate Gibbs free energy at 180 K.



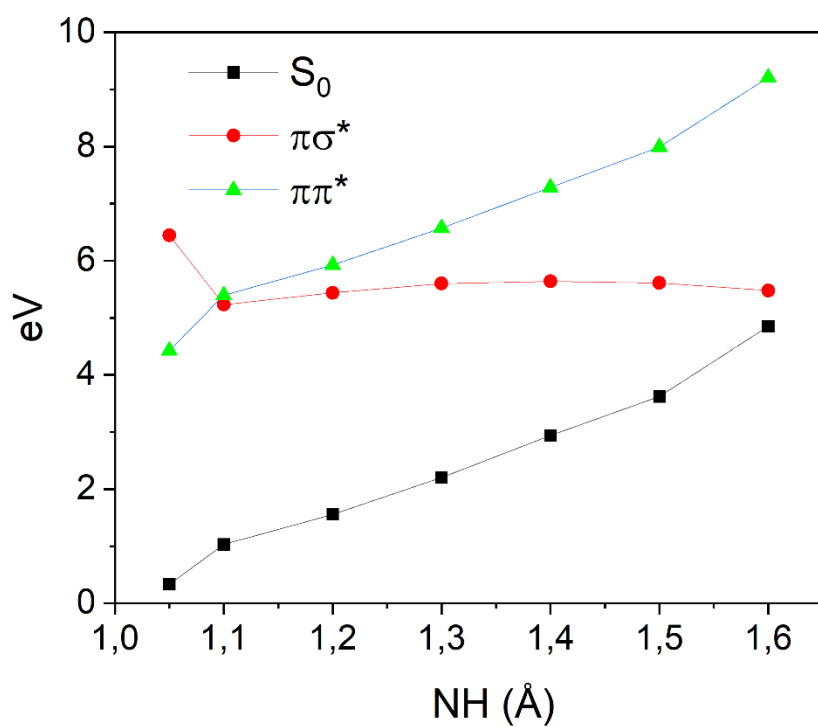

**Fig. S12** Minimum Energy Path (MEP) for the G1-1  $\text{DAH}^+(\text{H}_2\text{O})_3$  conformer along the N-H stretch not involved in H-bond (free N-H).

## Reference

1. J. M. Voss, K. C. Fischer and E. Garand, *J. Phys. Chem. Lett.*, 2018, **9**, 2246-2250.
